# Supplementary material for: Sleep Health
Source: MDPI journal article supplement (doi:10.3390/ctn8010008), 2024-01-24
Supplement: s1 [file s1]

## BERNESE SLEEP HEALTH QUESTIONNAIRE (BSHQ)

|                                                                                                                                                                                                                                                                                                                                                                                                                                                                                                                                                                                                                                                                                                                                                                                                                                                                                     |  |                                                                                                                        |  |                                                                                                                                                                                                                                                                                                                                                                                                                                                                      |  |
|-------------------------------------------------------------------------------------------------------------------------------------------------------------------------------------------------------------------------------------------------------------------------------------------------------------------------------------------------------------------------------------------------------------------------------------------------------------------------------------------------------------------------------------------------------------------------------------------------------------------------------------------------------------------------------------------------------------------------------------------------------------------------------------------------------------------------------------------------------------------------------------|--|------------------------------------------------------------------------------------------------------------------------|--|----------------------------------------------------------------------------------------------------------------------------------------------------------------------------------------------------------------------------------------------------------------------------------------------------------------------------------------------------------------------------------------------------------------------------------------------------------------------|--|
| Date: _____                                                                                                                                                                                                                                                                                                                                                                                                                                                                                                                                                                                                                                                                                                                                                                                                                                                                         |  | Filled by: <input type="checkbox"/> Patient <input type="checkbox"/> Relative <input type="checkbox"/> Physician/Nurse |  | Patient ID: _____                                                                                                                                                                                                                                                                                                                                                                                                                                                    |  |
| Last Name: _____                                                                                                                                                                                                                                                                                                                                                                                                                                                                                                                                                                                                                                                                                                                                                                                                                                                                    |  | First Name: _____                                                                                                      |  | Date of Birth: ____/____/____                                                                                                                                                                                                                                                                                                                                                                                                                                        |  |
| <p>H1: How much sleep do you typically get per night? _____ hours (e.g. 8.5 hrs)</p> <p>H2: How much time do you typically spend in bed per night? _____ hours (e.g. 9.5 hrs)</p> <p>H3: I consider myself to be:<br/> <input type="checkbox"/> definitely a 'morning' type      <input type="checkbox"/> more a 'morning' than 'evening' type<br/> <input type="checkbox"/> definitely an 'evening' type      <input type="checkbox"/> more an 'evening' than 'morning' type</p> <p>H4: Shift-Work: <input type="checkbox"/> Yes, currently   <input type="checkbox"/> Previously, in the past 7 years   <input type="checkbox"/> No, never</p> <p>H5: Do you have the impression you might suffer from a sleep disorder? <input type="checkbox"/> Yes <input type="checkbox"/> No</p> <p><b>Answer all questions for what has been typical for you for the last 3 months.</b></p> |  |                                                                                                                        |  | <div style="writing-mode: vertical-rl; transform: rotate(180deg);">NEVER or RARELY</div> <div style="writing-mode: vertical-rl; transform: rotate(180deg);">1-3 TIMES A MONTH</div> <div style="writing-mode: vertical-rl; transform: rotate(180deg);">1-2 TIMES A WEEK</div> <div style="writing-mode: vertical-rl; transform: rotate(180deg);">3-5 TIMES A WEEK</div> <div style="writing-mode: vertical-rl; transform: rotate(180deg);">&gt; 5 TIMES A WEEK</div> |  |
| 1. I snore                                                                                                                                                                                                                                                                                                                                                                                                                                                                                                                                                                                                                                                                                                                                                                                                                                                                          |  |                                                                                                                        |  |                                                                                                                                                                                                                                                                                                                                                                                                                                                                      |  |
| 2. I doze off or fall asleep during the daytime when you don't mean to? (e.g. when working, reading or driving)                                                                                                                                                                                                                                                                                                                                                                                                                                                                                                                                                                                                                                                                                                                                                                     |  |                                                                                                                        |  |                                                                                                                                                                                                                                                                                                                                                                                                                                                                      |  |
| 3. I feel tired, fatigued, exhausted or lack energy during the day                                                                                                                                                                                                                                                                                                                                                                                                                                                                                                                                                                                                                                                                                                                                                                                                                  |  |                                                                                                                        |  |                                                                                                                                                                                                                                                                                                                                                                                                                                                                      |  |
| 4. I have problems to fall asleep or awake for 30 minutes or more during the night                                                                                                                                                                                                                                                                                                                                                                                                                                                                                                                                                                                                                                                                                                                                                                                                  |  |                                                                                                                        |  |                                                                                                                                                                                                                                                                                                                                                                                                                                                                      |  |
| 5. I take substances to help me sleep                                                                                                                                                                                                                                                                                                                                                                                                                                                                                                                                                                                                                                                                                                                                                                                                                                               |  |                                                                                                                        |  |                                                                                                                                                                                                                                                                                                                                                                                                                                                                      |  |
| 6. I take naps during the day                                                                                                                                                                                                                                                                                                                                                                                                                                                                                                                                                                                                                                                                                                                                                                                                                                                       |  |                                                                                                                        |  |                                                                                                                                                                                                                                                                                                                                                                                                                                                                      |  |
| 7. My bedtime or waketime varies by more than 2 hours from one day to the other                                                                                                                                                                                                                                                                                                                                                                                                                                                                                                                                                                                                                                                                                                                                                                                                     |  |                                                                                                                        |  |                                                                                                                                                                                                                                                                                                                                                                                                                                                                      |  |
| 8. When I try to relax in the evening or sleep at night, I have unpleasant, restless feelings in my legs that can be relieved by walking or movement                                                                                                                                                                                                                                                                                                                                                                                                                                                                                                                                                                                                                                                                                                                                |  |                                                                                                                        |  |                                                                                                                                                                                                                                                                                                                                                                                                                                                                      |  |
| 9. I have been told that I walk, talk, eat, act strangely or violently when asleep                                                                                                                                                                                                                                                                                                                                                                                                                                                                                                                                                                                                                                                                                                                                                                                                  |  |                                                                                                                        |  |                                                                                                                                                                                                                                                                                                                                                                                                                                                                      |  |
| 10. I have nightmares                                                                                                                                                                                                                                                                                                                                                                                                                                                                                                                                                                                                                                                                                                                                                                                                                                                               |  |                                                                                                                        |  |                                                                                                                                                                                                                                                                                                                                                                                                                                                                      |  |
| 11. My daily activities are hindered by sleep difficulties                                                                                                                                                                                                                                                                                                                                                                                                                                                                                                                                                                                                                                                                                                                                                                                                                          |  |                                                                                                                        |  |                                                                                                                                                                                                                                                                                                                                                                                                                                                                      |  |

  

| <p>Sex: <input type="checkbox"/> M <input type="checkbox"/> F <input type="checkbox"/> div</p> <p>Age: _____</p> <p>Neck circumference: _____ cm</p> <p>Height: _____ cm</p> <p>Weight: _____ kg   =&gt; BMI = _____</p> <p>Hypertension: <input type="checkbox"/> Yes <input type="checkbox"/> No</p> <p>Smoking: <input type="checkbox"/> Yes, more than 5 cigarettes a day<br/> <input type="checkbox"/> No   <input type="checkbox"/> Yes, occasionally</p> <p>Alcohol: <input type="checkbox"/> Every day <input type="checkbox"/> 3-6 times a week<br/> <input type="checkbox"/> 1-2 times a week <input type="checkbox"/> Rarely/never</p> | <table border="1" style="margin: auto;"> <tr><th colspan="2">NoSAS Score</th></tr> <tr><th></th><th>Pt</th></tr> <tr><td>♂</td><td>2</td></tr> <tr><td>age&gt;55</td><td>4</td></tr> <tr><td>neck &gt;40cm</td><td>4</td></tr> <tr><td>BMI 25-30 // &gt;30</td><td>3//5</td></tr> <tr><td>snoring=2</td><td>2</td></tr> <tr><td><b>Total</b></td><td><b>≥8</b></td></tr> </table> | NoSAS Score |  |  | Pt | ♂ | 2 | age>55 | 4 | neck >40cm | 4 | BMI 25-30 // >30 | 3//5 | snoring=2 | 2 | <b>Total</b> | <b>≥8</b> | <table border="1" style="width: 100%;"> <tr><th colspan="2">SLEEP HEALTH SCORE</th></tr> <tr><td colspan="2">1pt/item</td></tr> <tr><td>Duration: H1 = 6-8h</td><td></td></tr> <tr><td>Morning type: H3</td><td></td></tr> <tr><td>Snoring: ① ≤1</td><td></td></tr> <tr><td>Sleepiness: ④ &amp; ⑤ ≤1</td><td></td></tr> <tr><td>Insomnia: ④ &amp; ⑤ ≤1</td><td></td></tr> <tr><td>Regularity: ② ≤1 &amp; H4 = no</td><td></td></tr> <tr><td>Sleep Disorder: ③ &amp; ④ &amp; ⑤ ≤1</td><td></td></tr> <tr><td>Satisfaction: ③ ≤1</td><td></td></tr> <tr><td><b>Total</b></td><td></td></tr> </table> | SLEEP HEALTH SCORE |  | 1pt/item |  | Duration: H1 = 6-8h |  | Morning type: H3 |  | Snoring: ① ≤1 |  | Sleepiness: ④ & ⑤ ≤1 |  | Insomnia: ④ & ⑤ ≤1 |  | Regularity: ② ≤1 & H4 = no |  | Sleep Disorder: ③ & ④ & ⑤ ≤1 |  | Satisfaction: ③ ≤1 |  | <b>Total</b> |  |
|---------------------------------------------------------------------------------------------------------------------------------------------------------------------------------------------------------------------------------------------------------------------------------------------------------------------------------------------------------------------------------------------------------------------------------------------------------------------------------------------------------------------------------------------------------------------------------------------------------------------------------------------------|-----------------------------------------------------------------------------------------------------------------------------------------------------------------------------------------------------------------------------------------------------------------------------------------------------------------------------------------------------------------------------------|-------------|--|--|----|---|---|--------|---|------------|---|------------------|------|-----------|---|--------------|-----------|----------------------------------------------------------------------------------------------------------------------------------------------------------------------------------------------------------------------------------------------------------------------------------------------------------------------------------------------------------------------------------------------------------------------------------------------------------------------------------------------------------------------------------------------------------------------------------------------------|--------------------|--|----------|--|---------------------|--|------------------|--|---------------|--|----------------------|--|--------------------|--|----------------------------|--|------------------------------|--|--------------------|--|--------------|--|
| NoSAS Score                                                                                                                                                                                                                                                                                                                                                                                                                                                                                                                                                                                                                                       |                                                                                                                                                                                                                                                                                                                                                                                   |             |  |  |    |   |   |        |   |            |   |                  |      |           |   |              |           |                                                                                                                                                                                                                                                                                                                                                                                                                                                                                                                                                                                                    |                    |  |          |  |                     |  |                  |  |               |  |                      |  |                    |  |                            |  |                              |  |                    |  |              |  |
|                                                                                                                                                                                                                                                                                                                                                                                                                                                                                                                                                                                                                                                   | Pt                                                                                                                                                                                                                                                                                                                                                                                |             |  |  |    |   |   |        |   |            |   |                  |      |           |   |              |           |                                                                                                                                                                                                                                                                                                                                                                                                                                                                                                                                                                                                    |                    |  |          |  |                     |  |                  |  |               |  |                      |  |                    |  |                            |  |                              |  |                    |  |              |  |
| ♂                                                                                                                                                                                                                                                                                                                                                                                                                                                                                                                                                                                                                                                 | 2                                                                                                                                                                                                                                                                                                                                                                                 |             |  |  |    |   |   |        |   |            |   |                  |      |           |   |              |           |                                                                                                                                                                                                                                                                                                                                                                                                                                                                                                                                                                                                    |                    |  |          |  |                     |  |                  |  |               |  |                      |  |                    |  |                            |  |                              |  |                    |  |              |  |
| age>55                                                                                                                                                                                                                                                                                                                                                                                                                                                                                                                                                                                                                                            | 4                                                                                                                                                                                                                                                                                                                                                                                 |             |  |  |    |   |   |        |   |            |   |                  |      |           |   |              |           |                                                                                                                                                                                                                                                                                                                                                                                                                                                                                                                                                                                                    |                    |  |          |  |                     |  |                  |  |               |  |                      |  |                    |  |                            |  |                              |  |                    |  |              |  |
| neck >40cm                                                                                                                                                                                                                                                                                                                                                                                                                                                                                                                                                                                                                                        | 4                                                                                                                                                                                                                                                                                                                                                                                 |             |  |  |    |   |   |        |   |            |   |                  |      |           |   |              |           |                                                                                                                                                                                                                                                                                                                                                                                                                                                                                                                                                                                                    |                    |  |          |  |                     |  |                  |  |               |  |                      |  |                    |  |                            |  |                              |  |                    |  |              |  |
| BMI 25-30 // >30                                                                                                                                                                                                                                                                                                                                                                                                                                                                                                                                                                                                                                  | 3//5                                                                                                                                                                                                                                                                                                                                                                              |             |  |  |    |   |   |        |   |            |   |                  |      |           |   |              |           |                                                                                                                                                                                                                                                                                                                                                                                                                                                                                                                                                                                                    |                    |  |          |  |                     |  |                  |  |               |  |                      |  |                    |  |                            |  |                              |  |                    |  |              |  |
| snoring=2                                                                                                                                                                                                                                                                                                                                                                                                                                                                                                                                                                                                                                         | 2                                                                                                                                                                                                                                                                                                                                                                                 |             |  |  |    |   |   |        |   |            |   |                  |      |           |   |              |           |                                                                                                                                                                                                                                                                                                                                                                                                                                                                                                                                                                                                    |                    |  |          |  |                     |  |                  |  |               |  |                      |  |                    |  |                            |  |                              |  |                    |  |              |  |
| <b>Total</b>                                                                                                                                                                                                                                                                                                                                                                                                                                                                                                                                                                                                                                      | <b>≥8</b>                                                                                                                                                                                                                                                                                                                                                                         |             |  |  |    |   |   |        |   |            |   |                  |      |           |   |              |           |                                                                                                                                                                                                                                                                                                                                                                                                                                                                                                                                                                                                    |                    |  |          |  |                     |  |                  |  |               |  |                      |  |                    |  |                            |  |                              |  |                    |  |              |  |
| SLEEP HEALTH SCORE                                                                                                                                                                                                                                                                                                                                                                                                                                                                                                                                                                                                                                |                                                                                                                                                                                                                                                                                                                                                                                   |             |  |  |    |   |   |        |   |            |   |                  |      |           |   |              |           |                                                                                                                                                                                                                                                                                                                                                                                                                                                                                                                                                                                                    |                    |  |          |  |                     |  |                  |  |               |  |                      |  |                    |  |                            |  |                              |  |                    |  |              |  |
| 1pt/item                                                                                                                                                                                                                                                                                                                                                                                                                                                                                                                                                                                                                                          |                                                                                                                                                                                                                                                                                                                                                                                   |             |  |  |    |   |   |        |   |            |   |                  |      |           |   |              |           |                                                                                                                                                                                                                                                                                                                                                                                                                                                                                                                                                                                                    |                    |  |          |  |                     |  |                  |  |               |  |                      |  |                    |  |                            |  |                              |  |                    |  |              |  |
| Duration: H1 = 6-8h                                                                                                                                                                                                                                                                                                                                                                                                                                                                                                                                                                                                                               |                                                                                                                                                                                                                                                                                                                                                                                   |             |  |  |    |   |   |        |   |            |   |                  |      |           |   |              |           |                                                                                                                                                                                                                                                                                                                                                                                                                                                                                                                                                                                                    |                    |  |          |  |                     |  |                  |  |               |  |                      |  |                    |  |                            |  |                              |  |                    |  |              |  |
| Morning type: H3                                                                                                                                                                                                                                                                                                                                                                                                                                                                                                                                                                                                                                  |                                                                                                                                                                                                                                                                                                                                                                                   |             |  |  |    |   |   |        |   |            |   |                  |      |           |   |              |           |                                                                                                                                                                                                                                                                                                                                                                                                                                                                                                                                                                                                    |                    |  |          |  |                     |  |                  |  |               |  |                      |  |                    |  |                            |  |                              |  |                    |  |              |  |
| Snoring: ① ≤1                                                                                                                                                                                                                                                                                                                                                                                                                                                                                                                                                                                                                                     |                                                                                                                                                                                                                                                                                                                                                                                   |             |  |  |    |   |   |        |   |            |   |                  |      |           |   |              |           |                                                                                                                                                                                                                                                                                                                                                                                                                                                                                                                                                                                                    |                    |  |          |  |                     |  |                  |  |               |  |                      |  |                    |  |                            |  |                              |  |                    |  |              |  |
| Sleepiness: ④ & ⑤ ≤1                                                                                                                                                                                                                                                                                                                                                                                                                                                                                                                                                                                                                              |                                                                                                                                                                                                                                                                                                                                                                                   |             |  |  |    |   |   |        |   |            |   |                  |      |           |   |              |           |                                                                                                                                                                                                                                                                                                                                                                                                                                                                                                                                                                                                    |                    |  |          |  |                     |  |                  |  |               |  |                      |  |                    |  |                            |  |                              |  |                    |  |              |  |
| Insomnia: ④ & ⑤ ≤1                                                                                                                                                                                                                                                                                                                                                                                                                                                                                                                                                                                                                                |                                                                                                                                                                                                                                                                                                                                                                                   |             |  |  |    |   |   |        |   |            |   |                  |      |           |   |              |           |                                                                                                                                                                                                                                                                                                                                                                                                                                                                                                                                                                                                    |                    |  |          |  |                     |  |                  |  |               |  |                      |  |                    |  |                            |  |                              |  |                    |  |              |  |
| Regularity: ② ≤1 & H4 = no                                                                                                                                                                                                                                                                                                                                                                                                                                                                                                                                                                                                                        |                                                                                                                                                                                                                                                                                                                                                                                   |             |  |  |    |   |   |        |   |            |   |                  |      |           |   |              |           |                                                                                                                                                                                                                                                                                                                                                                                                                                                                                                                                                                                                    |                    |  |          |  |                     |  |                  |  |               |  |                      |  |                    |  |                            |  |                              |  |                    |  |              |  |
| Sleep Disorder: ③ & ④ & ⑤ ≤1                                                                                                                                                                                                                                                                                                                                                                                                                                                                                                                                                                                                                      |                                                                                                                                                                                                                                                                                                                                                                                   |             |  |  |    |   |   |        |   |            |   |                  |      |           |   |              |           |                                                                                                                                                                                                                                                                                                                                                                                                                                                                                                                                                                                                    |                    |  |          |  |                     |  |                  |  |               |  |                      |  |                    |  |                            |  |                              |  |                    |  |              |  |
| Satisfaction: ③ ≤1                                                                                                                                                                                                                                                                                                                                                                                                                                                                                                                                                                                                                                |                                                                                                                                                                                                                                                                                                                                                                                   |             |  |  |    |   |   |        |   |            |   |                  |      |           |   |              |           |                                                                                                                                                                                                                                                                                                                                                                                                                                                                                                                                                                                                    |                    |  |          |  |                     |  |                  |  |               |  |                      |  |                    |  |                            |  |                              |  |                    |  |              |  |
| <b>Total</b>                                                                                                                                                                                                                                                                                                                                                                                                                                                                                                                                                                                                                                      |                                                                                                                                                                                                                                                                                                                                                                                   |             |  |  |    |   |   |        |   |            |   |                  |      |           |   |              |           |                                                                                                                                                                                                                                                                                                                                                                                                                                                                                                                                                                                                    |                    |  |          |  |                     |  |                  |  |               |  |                      |  |                    |  |                            |  |                              |  |                    |  |              |  |

  

| cm/Kg      | 155 | 160 | 165 | 170 | 175 | 180 | 185 | 190 | 195 |
|------------|-----|-----|-----|-----|-----|-----|-----|-----|-----|
| >25 BMI => | 60  | 65  | 70  | 75  | 80  | 85  | 90  | 95  | 95  |
| >30 BMI => | 75  | 80  | 85  | 90  | 95  | 100 | 105 | 110 | 115 |

## BERNESE SLEEP HEALTH QUESTIONNAIRE (BSHQ) - FRENCH

|                                                                                                                                                                                                                                                                                                                                                                                                                                                                                                                                                                                                                                                                                                                                                                                                                                                                                                |  |                                                                                                                         |  |                                    |                                                                                                                                                                         |
|------------------------------------------------------------------------------------------------------------------------------------------------------------------------------------------------------------------------------------------------------------------------------------------------------------------------------------------------------------------------------------------------------------------------------------------------------------------------------------------------------------------------------------------------------------------------------------------------------------------------------------------------------------------------------------------------------------------------------------------------------------------------------------------------------------------------------------------------------------------------------------------------|--|-------------------------------------------------------------------------------------------------------------------------|--|------------------------------------|-------------------------------------------------------------------------------------------------------------------------------------------------------------------------|
| Date :                                                                                                                                                                                                                                                                                                                                                                                                                                                                                                                                                                                                                                                                                                                                                                                                                                                                                         |  | Rempli par : <input type="checkbox"/> patient <input type="checkbox"/> proche <input type="checkbox"/> médecin/soignant |  |                                    | ID du patient :                                                                                                                                                         |
| Nom de famille:                                                                                                                                                                                                                                                                                                                                                                                                                                                                                                                                                                                                                                                                                                                                                                                                                                                                                |  | Prénom:                                                                                                                 |  | Date de naissance : ____/____/____ |                                                                                                                                                                         |
| <p>H1: Combien d'heures dormez vous typiquement par nuit? ____ heures (par ex. 8.5 h)</p> <p>H2: Combien de temps vous typiquement allongé dans le lit chaque nuit? ____ heures (par ex. 9.5 h)</p> <p>H3: Je me considère comme: <input type="checkbox"/> Tout à fait type du matin <input type="checkbox"/> Plutôt type du matin<br/> <input type="checkbox"/> Tout à fait de type du soir <input type="checkbox"/> Plutôt type du soir</p> <p>H4: Travail en équipe: <input type="checkbox"/> Oui, actuellement <input type="checkbox"/> Au cours des 7 dernières années <input type="checkbox"/> Non, jamais</p> <p>H5 : Avez-vous l'impression que vous pourriez souffrir d'une maladie du sommeil ? <input type="checkbox"/> Oui <input type="checkbox"/> Non</p> <p><b>Veillez répondre à toutes les questions comme vous l'avez fait typiquement au cours des 3 derniers mois.</b></p> |  |                                                                                                                         |  |                                    | <b>JAMAIS ou RAREMENT</b><br><br><b>1 À 3 FOIS PAR MOIS</b><br><br><b>1-2 FOIS PAR SEMAINE</b><br><br><b>3-5 FOIS PAR SEMAINE</b><br><br><b>&gt; 5 FOIS PAR SEMAINE</b> |
| 1. Je ronfle                                                                                                                                                                                                                                                                                                                                                                                                                                                                                                                                                                                                                                                                                                                                                                                                                                                                                   |  |                                                                                                                         |  |                                    |                                                                                                                                                                         |
| 2. Je m'assoupis involontairement pendant la journée (p. ex. en travaillant, en lisant, en conduisant)                                                                                                                                                                                                                                                                                                                                                                                                                                                                                                                                                                                                                                                                                                                                                                                         |  |                                                                                                                         |  |                                    |                                                                                                                                                                         |
| 3. Je me sens fatigué(e), épuisé(e) ou sans énergie pendant la journée                                                                                                                                                                                                                                                                                                                                                                                                                                                                                                                                                                                                                                                                                                                                                                                                                         |  |                                                                                                                         |  |                                    |                                                                                                                                                                         |
| 4. J'ai du mal à m'endormir ou je reste éveillé(e) pendant 30 minutes ou plus la nuit                                                                                                                                                                                                                                                                                                                                                                                                                                                                                                                                                                                                                                                                                                                                                                                                          |  |                                                                                                                         |  |                                    |                                                                                                                                                                         |
| 5. Je prends des substances pour mieux dormir                                                                                                                                                                                                                                                                                                                                                                                                                                                                                                                                                                                                                                                                                                                                                                                                                                                  |  |                                                                                                                         |  |                                    |                                                                                                                                                                         |
| 6. Je fais une sieste/un petit somme pendant la journée                                                                                                                                                                                                                                                                                                                                                                                                                                                                                                                                                                                                                                                                                                                                                                                                                                        |  |                                                                                                                         |  |                                    |                                                                                                                                                                         |
| 7. L'heure de mon coucher ou de mon lever diffère d'un jour à l'autre de plus de deux heures                                                                                                                                                                                                                                                                                                                                                                                                                                                                                                                                                                                                                                                                                                                                                                                                   |  |                                                                                                                         |  |                                    |                                                                                                                                                                         |
| 8. Lorsque je me détends le soir ou que je veux dormir la nuit, j'ai une sensation désagréable d'agitation dans les jambes, qui s'améliore lorsque je bouge ou que je me promène                                                                                                                                                                                                                                                                                                                                                                                                                                                                                                                                                                                                                                                                                                               |  |                                                                                                                         |  |                                    |                                                                                                                                                                         |
| 9. On m'a dit que je marchais, parlais, agissais bizarrement ou violemment pendant mon sommeil                                                                                                                                                                                                                                                                                                                                                                                                                                                                                                                                                                                                                                                                                                                                                                                                 |  |                                                                                                                         |  |                                    |                                                                                                                                                                         |
| 10. Je fais des cauchemars                                                                                                                                                                                                                                                                                                                                                                                                                                                                                                                                                                                                                                                                                                                                                                                                                                                                     |  |                                                                                                                         |  |                                    |                                                                                                                                                                         |
| 11. Mes activités quotidiennes sont perturbées par des problèmes de sommeil                                                                                                                                                                                                                                                                                                                                                                                                                                                                                                                                                                                                                                                                                                                                                                                                                    |  |                                                                                                                         |  |                                    |                                                                                                                                                                         |

| <p>Sexe: <input type="checkbox"/> M <input type="checkbox"/> F <input type="checkbox"/> div</p> <p>Âge: ____</p> <p>Tour de cou / col: ____ cm</p> <p>Taille: ____ cm</p> <p>Poids: ____ kg =&gt; IMC: <input type="checkbox"/> &lt;25 <input type="checkbox"/> 25-30 <input type="checkbox"/> &gt;30</p> <p>Hypertension artérielle: <input type="checkbox"/> Oui <input type="checkbox"/> Non <input type="checkbox"/> Inconnue</p> <p>Fumer : <input type="checkbox"/> Oui, plus de 5 cigarettes par jour<br/> <input type="checkbox"/> Non <input type="checkbox"/> Oui, occasionnellement</p> <p>Alcool : <input type="checkbox"/> Tous les jours<br/> <input type="checkbox"/> 3-6 fois par semaine<br/> <input type="checkbox"/> 1 à 2 fois par semaine<br/> <input type="checkbox"/> Rarement/jamais</p> | <p><b>NoSAS Score</b></p> <table border="1" style="margin: auto;"> <thead> <tr> <th></th> <th>Pt</th> <th>Apnea Score</th> </tr> </thead> <tbody> <tr><td>♂</td><td>2</td><td></td></tr> <tr><td>Âge &gt;55</td><td>4</td><td></td></tr> <tr><td>Col &gt;40cm</td><td>4</td><td></td></tr> <tr><td>IMC 25-30 // &gt;30</td><td>3//5</td><td></td></tr> <tr><td>Ronflement =2</td><td>2</td><td></td></tr> <tr><td><b>Total</b></td><td><b>&gt;8</b></td><td></td></tr> </tbody> </table> |             | Pt | Apnea Score | ♂ | 2 |  | Âge >55 | 4 |  | Col >40cm | 4 |  | IMC 25-30 // >30 | 3//5 |  | Ronflement =2 | 2 |  | <b>Total</b> | <b>&gt;8</b> |  | <p><b>SLEEP HEALTH SCORE</b></p> <table border="1" style="width: 100%;"> <thead> <tr> <th></th> <th>1pt/item</th> </tr> </thead> <tbody> <tr><td>Durée: H1 = 6-8h</td><td></td></tr> <tr><td>Type du matin: H3 = Type du matin</td><td></td></tr> <tr><td>Ronflement: ① ≤1</td><td></td></tr> <tr><td>Somnolence diurne: ② ≤1</td><td></td></tr> <tr><td>Insomnie: ④&amp;⑤ ≤1</td><td></td></tr> <tr><td>Régularité / travail en équipe: ⑦ ≤1 &amp; H4 = no</td><td></td></tr> <tr><td>Troubles du sommeil: ③&amp;⑥&amp;⑧ ≤1</td><td></td></tr> <tr><td>Satisfaction: ⑩ ≤1</td><td></td></tr> <tr><td><b>Totale</b></td><td></td></tr> </tbody> </table> |  | 1pt/item | Durée: H1 = 6-8h |  | Type du matin: H3 = Type du matin |  | Ronflement: ① ≤1 |  | Somnolence diurne: ② ≤1 |  | Insomnie: ④&⑤ ≤1 |  | Régularité / travail en équipe: ⑦ ≤1 & H4 = no |  | Troubles du sommeil: ③&⑥&⑧ ≤1 |  | Satisfaction: ⑩ ≤1 |  | <b>Totale</b> |  |
|------------------------------------------------------------------------------------------------------------------------------------------------------------------------------------------------------------------------------------------------------------------------------------------------------------------------------------------------------------------------------------------------------------------------------------------------------------------------------------------------------------------------------------------------------------------------------------------------------------------------------------------------------------------------------------------------------------------------------------------------------------------------------------------------------------------|------------------------------------------------------------------------------------------------------------------------------------------------------------------------------------------------------------------------------------------------------------------------------------------------------------------------------------------------------------------------------------------------------------------------------------------------------------------------------------------|-------------|----|-------------|---|---|--|---------|---|--|-----------|---|--|------------------|------|--|---------------|---|--|--------------|--------------|--|----------------------------------------------------------------------------------------------------------------------------------------------------------------------------------------------------------------------------------------------------------------------------------------------------------------------------------------------------------------------------------------------------------------------------------------------------------------------------------------------------------------------------------------------------------------------------------------------------------------------------------------------------------|--|----------|------------------|--|-----------------------------------|--|------------------|--|-------------------------|--|------------------|--|------------------------------------------------|--|-------------------------------|--|--------------------|--|---------------|--|
|                                                                                                                                                                                                                                                                                                                                                                                                                                                                                                                                                                                                                                                                                                                                                                                                                  | Pt                                                                                                                                                                                                                                                                                                                                                                                                                                                                                       | Apnea Score |    |             |   |   |  |         |   |  |           |   |  |                  |      |  |               |   |  |              |              |  |                                                                                                                                                                                                                                                                                                                                                                                                                                                                                                                                                                                                                                                          |  |          |                  |  |                                   |  |                  |  |                         |  |                  |  |                                                |  |                               |  |                    |  |               |  |
| ♂                                                                                                                                                                                                                                                                                                                                                                                                                                                                                                                                                                                                                                                                                                                                                                                                                | 2                                                                                                                                                                                                                                                                                                                                                                                                                                                                                        |             |    |             |   |   |  |         |   |  |           |   |  |                  |      |  |               |   |  |              |              |  |                                                                                                                                                                                                                                                                                                                                                                                                                                                                                                                                                                                                                                                          |  |          |                  |  |                                   |  |                  |  |                         |  |                  |  |                                                |  |                               |  |                    |  |               |  |
| Âge >55                                                                                                                                                                                                                                                                                                                                                                                                                                                                                                                                                                                                                                                                                                                                                                                                          | 4                                                                                                                                                                                                                                                                                                                                                                                                                                                                                        |             |    |             |   |   |  |         |   |  |           |   |  |                  |      |  |               |   |  |              |              |  |                                                                                                                                                                                                                                                                                                                                                                                                                                                                                                                                                                                                                                                          |  |          |                  |  |                                   |  |                  |  |                         |  |                  |  |                                                |  |                               |  |                    |  |               |  |
| Col >40cm                                                                                                                                                                                                                                                                                                                                                                                                                                                                                                                                                                                                                                                                                                                                                                                                        | 4                                                                                                                                                                                                                                                                                                                                                                                                                                                                                        |             |    |             |   |   |  |         |   |  |           |   |  |                  |      |  |               |   |  |              |              |  |                                                                                                                                                                                                                                                                                                                                                                                                                                                                                                                                                                                                                                                          |  |          |                  |  |                                   |  |                  |  |                         |  |                  |  |                                                |  |                               |  |                    |  |               |  |
| IMC 25-30 // >30                                                                                                                                                                                                                                                                                                                                                                                                                                                                                                                                                                                                                                                                                                                                                                                                 | 3//5                                                                                                                                                                                                                                                                                                                                                                                                                                                                                     |             |    |             |   |   |  |         |   |  |           |   |  |                  |      |  |               |   |  |              |              |  |                                                                                                                                                                                                                                                                                                                                                                                                                                                                                                                                                                                                                                                          |  |          |                  |  |                                   |  |                  |  |                         |  |                  |  |                                                |  |                               |  |                    |  |               |  |
| Ronflement =2                                                                                                                                                                                                                                                                                                                                                                                                                                                                                                                                                                                                                                                                                                                                                                                                    | 2                                                                                                                                                                                                                                                                                                                                                                                                                                                                                        |             |    |             |   |   |  |         |   |  |           |   |  |                  |      |  |               |   |  |              |              |  |                                                                                                                                                                                                                                                                                                                                                                                                                                                                                                                                                                                                                                                          |  |          |                  |  |                                   |  |                  |  |                         |  |                  |  |                                                |  |                               |  |                    |  |               |  |
| <b>Total</b>                                                                                                                                                                                                                                                                                                                                                                                                                                                                                                                                                                                                                                                                                                                                                                                                     | <b>&gt;8</b>                                                                                                                                                                                                                                                                                                                                                                                                                                                                             |             |    |             |   |   |  |         |   |  |           |   |  |                  |      |  |               |   |  |              |              |  |                                                                                                                                                                                                                                                                                                                                                                                                                                                                                                                                                                                                                                                          |  |          |                  |  |                                   |  |                  |  |                         |  |                  |  |                                                |  |                               |  |                    |  |               |  |
|                                                                                                                                                                                                                                                                                                                                                                                                                                                                                                                                                                                                                                                                                                                                                                                                                  | 1pt/item                                                                                                                                                                                                                                                                                                                                                                                                                                                                                 |             |    |             |   |   |  |         |   |  |           |   |  |                  |      |  |               |   |  |              |              |  |                                                                                                                                                                                                                                                                                                                                                                                                                                                                                                                                                                                                                                                          |  |          |                  |  |                                   |  |                  |  |                         |  |                  |  |                                                |  |                               |  |                    |  |               |  |
| Durée: H1 = 6-8h                                                                                                                                                                                                                                                                                                                                                                                                                                                                                                                                                                                                                                                                                                                                                                                                 |                                                                                                                                                                                                                                                                                                                                                                                                                                                                                          |             |    |             |   |   |  |         |   |  |           |   |  |                  |      |  |               |   |  |              |              |  |                                                                                                                                                                                                                                                                                                                                                                                                                                                                                                                                                                                                                                                          |  |          |                  |  |                                   |  |                  |  |                         |  |                  |  |                                                |  |                               |  |                    |  |               |  |
| Type du matin: H3 = Type du matin                                                                                                                                                                                                                                                                                                                                                                                                                                                                                                                                                                                                                                                                                                                                                                                |                                                                                                                                                                                                                                                                                                                                                                                                                                                                                          |             |    |             |   |   |  |         |   |  |           |   |  |                  |      |  |               |   |  |              |              |  |                                                                                                                                                                                                                                                                                                                                                                                                                                                                                                                                                                                                                                                          |  |          |                  |  |                                   |  |                  |  |                         |  |                  |  |                                                |  |                               |  |                    |  |               |  |
| Ronflement: ① ≤1                                                                                                                                                                                                                                                                                                                                                                                                                                                                                                                                                                                                                                                                                                                                                                                                 |                                                                                                                                                                                                                                                                                                                                                                                                                                                                                          |             |    |             |   |   |  |         |   |  |           |   |  |                  |      |  |               |   |  |              |              |  |                                                                                                                                                                                                                                                                                                                                                                                                                                                                                                                                                                                                                                                          |  |          |                  |  |                                   |  |                  |  |                         |  |                  |  |                                                |  |                               |  |                    |  |               |  |
| Somnolence diurne: ② ≤1                                                                                                                                                                                                                                                                                                                                                                                                                                                                                                                                                                                                                                                                                                                                                                                          |                                                                                                                                                                                                                                                                                                                                                                                                                                                                                          |             |    |             |   |   |  |         |   |  |           |   |  |                  |      |  |               |   |  |              |              |  |                                                                                                                                                                                                                                                                                                                                                                                                                                                                                                                                                                                                                                                          |  |          |                  |  |                                   |  |                  |  |                         |  |                  |  |                                                |  |                               |  |                    |  |               |  |
| Insomnie: ④&⑤ ≤1                                                                                                                                                                                                                                                                                                                                                                                                                                                                                                                                                                                                                                                                                                                                                                                                 |                                                                                                                                                                                                                                                                                                                                                                                                                                                                                          |             |    |             |   |   |  |         |   |  |           |   |  |                  |      |  |               |   |  |              |              |  |                                                                                                                                                                                                                                                                                                                                                                                                                                                                                                                                                                                                                                                          |  |          |                  |  |                                   |  |                  |  |                         |  |                  |  |                                                |  |                               |  |                    |  |               |  |
| Régularité / travail en équipe: ⑦ ≤1 & H4 = no                                                                                                                                                                                                                                                                                                                                                                                                                                                                                                                                                                                                                                                                                                                                                                   |                                                                                                                                                                                                                                                                                                                                                                                                                                                                                          |             |    |             |   |   |  |         |   |  |           |   |  |                  |      |  |               |   |  |              |              |  |                                                                                                                                                                                                                                                                                                                                                                                                                                                                                                                                                                                                                                                          |  |          |                  |  |                                   |  |                  |  |                         |  |                  |  |                                                |  |                               |  |                    |  |               |  |
| Troubles du sommeil: ③&⑥&⑧ ≤1                                                                                                                                                                                                                                                                                                                                                                                                                                                                                                                                                                                                                                                                                                                                                                                    |                                                                                                                                                                                                                                                                                                                                                                                                                                                                                          |             |    |             |   |   |  |         |   |  |           |   |  |                  |      |  |               |   |  |              |              |  |                                                                                                                                                                                                                                                                                                                                                                                                                                                                                                                                                                                                                                                          |  |          |                  |  |                                   |  |                  |  |                         |  |                  |  |                                                |  |                               |  |                    |  |               |  |
| Satisfaction: ⑩ ≤1                                                                                                                                                                                                                                                                                                                                                                                                                                                                                                                                                                                                                                                                                                                                                                                               |                                                                                                                                                                                                                                                                                                                                                                                                                                                                                          |             |    |             |   |   |  |         |   |  |           |   |  |                  |      |  |               |   |  |              |              |  |                                                                                                                                                                                                                                                                                                                                                                                                                                                                                                                                                                                                                                                          |  |          |                  |  |                                   |  |                  |  |                         |  |                  |  |                                                |  |                               |  |                    |  |               |  |
| <b>Totale</b>                                                                                                                                                                                                                                                                                                                                                                                                                                                                                                                                                                                                                                                                                                                                                                                                    |                                                                                                                                                                                                                                                                                                                                                                                                                                                                                          |             |    |             |   |   |  |         |   |  |           |   |  |                  |      |  |               |   |  |              |              |  |                                                                                                                                                                                                                                                                                                                                                                                                                                                                                                                                                                                                                                                          |  |          |                  |  |                                   |  |                  |  |                         |  |                  |  |                                                |  |                               |  |                    |  |               |  |

| cm/Kg      | 155 | 160 | 165 | 170 | 175 | 180 | 185 | 190 | 195 |
|------------|-----|-----|-----|-----|-----|-----|-----|-----|-----|
| >25 BMI => | 60  | 65  | 70  | 75  | 80  | 85  | 90  | 95  | 95  |
| >30 BMI => | 75  | 80  | 85  | 90  | 95  | 100 | 105 | 110 | 115 |

## BERNESE SLEEP HEALTH QUESTIONNAIRE (BSHQ) - ITALIANO

|                                                                                                                                                                                                                                                                                                                                                                                                                                                                                                                                                                                                                                                                                                                                                    |  |                                                                                                                               |  |                                                                                                                                                                       |  |
|----------------------------------------------------------------------------------------------------------------------------------------------------------------------------------------------------------------------------------------------------------------------------------------------------------------------------------------------------------------------------------------------------------------------------------------------------------------------------------------------------------------------------------------------------------------------------------------------------------------------------------------------------------------------------------------------------------------------------------------------------|--|-------------------------------------------------------------------------------------------------------------------------------|--|-----------------------------------------------------------------------------------------------------------------------------------------------------------------------|--|
| Data:                                                                                                                                                                                                                                                                                                                                                                                                                                                                                                                                                                                                                                                                                                                                              |  | Compilato da: <input type="checkbox"/> Paziente <input type="checkbox"/> Familiari <input type="checkbox"/> Medico/Infermiere |  | ID paziente:                                                                                                                                                          |  |
| Cognome:                                                                                                                                                                                                                                                                                                                                                                                                                                                                                                                                                                                                                                                                                                                                           |  | Nome:                                                                                                                         |  | Data di nascita: ____/____/____                                                                                                                                       |  |
| H1: Quante ore dorme di solito per notte? ____ (ad esempio 8.5 ore)<br>H2: Quante ore rimane a letto di solito per notte? ____ (es. 9.5 ore)<br>H3: E' una persona: <input type="checkbox"/> Molto più attiva il mattino che la sera <input type="checkbox"/> Più attiva il mattino che la sera<br><input type="checkbox"/> Più attiva la sera che il mattino <input type="checkbox"/> Molto più attiva la sera che il mattino<br>H4: Lavora a turni irregolari: <input type="checkbox"/> Sì, attualmente <input type="checkbox"/> In passato, negli ultimi 7 anni <input type="checkbox"/> No, mai<br>H5: Ha l'impressione di soffrire di un disturbo del sonno? <input type="checkbox"/> Sì <input type="checkbox"/> No <input type="checkbox"/> |  |                                                                                                                               |  | <b>MAI o RARAMENTE</b><br><br><b>1-3 VOLTE AL MESE</b><br><br><b>1-2 VOLTE A SETTIMANA</b><br><br><b>3-5 VOLTE A SETTIMANA</b><br><br><b>&gt; 5 VOLTE A SETTIMANA</b> |  |
| <b>Negli ultimi 3 mesi, le è capitato di:</b>                                                                                                                                                                                                                                                                                                                                                                                                                                                                                                                                                                                                                                                                                                      |  |                                                                                                                               |  |                                                                                                                                                                       |  |
| 1. Russare                                                                                                                                                                                                                                                                                                                                                                                                                                                                                                                                                                                                                                                                                                                                         |  |                                                                                                                               |  |                                                                                                                                                                       |  |
| 2. Addormentarsi involontariamente durante il giorno (ad esempio, mentre lavora, legge o è alla guida)                                                                                                                                                                                                                                                                                                                                                                                                                                                                                                                                                                                                                                             |  |                                                                                                                               |  |                                                                                                                                                                       |  |
| 3. Sentirsi stanco/a, depresso/a o privo/a di energia durante il giorno                                                                                                                                                                                                                                                                                                                                                                                                                                                                                                                                                                                                                                                                            |  |                                                                                                                               |  |                                                                                                                                                                       |  |
| 4. Avere difficoltà ad addormentarsi o restare sveglio durante la notte per più di 30 minuti?                                                                                                                                                                                                                                                                                                                                                                                                                                                                                                                                                                                                                                                      |  |                                                                                                                               |  |                                                                                                                                                                       |  |
| 5. Assumere farmaci per dormire                                                                                                                                                                                                                                                                                                                                                                                                                                                                                                                                                                                                                                                                                                                    |  |                                                                                                                               |  |                                                                                                                                                                       |  |
| 6. Fare un sonnellino durante il giorno                                                                                                                                                                                                                                                                                                                                                                                                                                                                                                                                                                                                                                                                                                            |  |                                                                                                                               |  |                                                                                                                                                                       |  |
| 7. Addormentarsi o svegliarsi con una variabilità maggiore di due ore tra un giorno e l'altro                                                                                                                                                                                                                                                                                                                                                                                                                                                                                                                                                                                                                                                      |  |                                                                                                                               |  |                                                                                                                                                                       |  |
| 8. Avvertire, la sera o prima dell'addormentamento, una sensazione spiacevole alle gambe che migliora con il movimento o il cammino?                                                                                                                                                                                                                                                                                                                                                                                                                                                                                                                                                                                                               |  |                                                                                                                               |  |                                                                                                                                                                       |  |
| 9. Parlare, camminare o comportarsi in modo strano o violento nel sonno                                                                                                                                                                                                                                                                                                                                                                                                                                                                                                                                                                                                                                                                            |  |                                                                                                                               |  |                                                                                                                                                                       |  |
| 10. Avere incubi                                                                                                                                                                                                                                                                                                                                                                                                                                                                                                                                                                                                                                                                                                                                   |  |                                                                                                                               |  |                                                                                                                                                                       |  |
| 11. Avvertire che le sue attività diurne siano influenzate da problemi di sonno                                                                                                                                                                                                                                                                                                                                                                                                                                                                                                                                                                                                                                                                    |  |                                                                                                                               |  |                                                                                                                                                                       |  |

| Genere: <input type="checkbox"/> M <input type="checkbox"/> F <input type="checkbox"/> div<br>Età: ____<br>Misura del collo / misura del colletto: ____ cm<br>Altezza: ____ cm<br>Peso: ____ kg => BMI = <input type="checkbox"/> <25 <input type="checkbox"/> 25-30 <input type="checkbox"/> >30<br>Pressione sanguigna elevata: <input type="checkbox"/> Sì <input type="checkbox"/> No<br>Fumo: <input type="checkbox"/> Sì, più di 5 sigarette al giorno<br><input type="checkbox"/> Sì, occasionalmente <input type="checkbox"/> No<br>Alcol: <input type="checkbox"/> Tutti i giorni <input type="checkbox"/> 3-6 volte a settimana<br><input type="checkbox"/> 1-2 volte a settimana <input type="checkbox"/> Raramente/mai |           | <table border="1"> <thead> <tr> <th colspan="2">NoSAS Score</th> <th>Apnea Score</th> </tr> <tr> <th></th> <th>Pt</th> <th></th> </tr> </thead> <tbody> <tr> <td>♂</td> <td>2</td> <td></td> </tr> <tr> <td>Età ≥ 55</td> <td>4</td> <td></td> </tr> <tr> <td>Misura del collo: ≥40cm</td> <td>4</td> <td></td> </tr> <tr> <td>BMI 25-30 // &gt;30</td> <td>3//5</td> <td></td> </tr> <tr> <td>Russare=2</td> <td>2</td> <td></td> </tr> <tr> <td><b>Totale</b></td> <td><b>≥8</b></td> <td></td> </tr> </tbody> </table> <table border="1"> <thead> <tr> <th>cm/kg</th> <th>155</th> <th>160</th> <th>165</th> <th>170</th> <th>175</th> <th>180</th> <th>185</th> <th>190</th> <th>195</th> </tr> </thead> <tbody> <tr> <td>&gt;25 BMI =&gt;</td> <td>60</td> <td>65</td> <td>70</td> <td>75</td> <td>80</td> <td>85</td> <td>90</td> <td>95</td> <td>95</td> </tr> <tr> <td>&gt;30 BMI =&gt;</td> <td>75</td> <td>80</td> <td>85</td> <td>90</td> <td>95</td> <td>100</td> <td>105</td> <td>110</td> <td>115</td> </tr> </tbody> </table> | NoSAS Score |     | Apnea Score |     | Pt  |     | ♂   | 2 |  | Età ≥ 55 | 4 |  | Misura del collo: ≥40cm | 4 |  | BMI 25-30 // >30 | 3//5 |  | Russare=2 | 2 |  | <b>Totale</b> | <b>≥8</b> |  | cm/kg | 155 | 160 | 165 | 170 | 175 | 180 | 185 | 190 | 195 | >25 BMI => | 60 | 65 | 70 | 75 | 80 | 85 | 90 | 95 | 95 | >30 BMI => | 75 | 80 | 85 | 90 | 95 | 100 | 105 | 110 | 115 | <table border="1"> <thead> <tr> <th colspan="2">SLEEP HEALTH SCORE</th> </tr> <tr> <th></th> <th>1pt/item</th> </tr> </thead> <tbody> <tr> <td>Durata: H1 = 6-8h</td> <td></td> </tr> <tr> <td>Tipo di mattina: H3</td> <td></td> </tr> <tr> <td>Russare: ① ≤1</td> <td></td> </tr> <tr> <td>Sonnolenza diurna: ② ≤1</td> <td></td> </tr> <tr> <td>Insonnia: ③&amp;⑤ ≤1</td> <td></td> </tr> <tr> <td>Regolarità: ⑦ ≤1 &amp; H4 = no</td> <td></td> </tr> <tr> <td>Disturbo del sonno: ⑧&amp;⑨&amp;⑩ ≤1</td> <td></td> </tr> <tr> <td>Soddisfazione: 11 ≤1</td> <td></td> </tr> <tr> <td><b>Total</b></td> <td></td> </tr> </tbody> </table> | SLEEP HEALTH SCORE |  |  | 1pt/item | Durata: H1 = 6-8h |  | Tipo di mattina: H3 |  | Russare: ① ≤1 |  | Sonnolenza diurna: ② ≤1 |  | Insonnia: ③&⑤ ≤1 |  | Regolarità: ⑦ ≤1 & H4 = no |  | Disturbo del sonno: ⑧&⑨&⑩ ≤1 |  | Soddisfazione: 11 ≤1 |  | <b>Total</b> |  |
|------------------------------------------------------------------------------------------------------------------------------------------------------------------------------------------------------------------------------------------------------------------------------------------------------------------------------------------------------------------------------------------------------------------------------------------------------------------------------------------------------------------------------------------------------------------------------------------------------------------------------------------------------------------------------------------------------------------------------------|-----------|----------------------------------------------------------------------------------------------------------------------------------------------------------------------------------------------------------------------------------------------------------------------------------------------------------------------------------------------------------------------------------------------------------------------------------------------------------------------------------------------------------------------------------------------------------------------------------------------------------------------------------------------------------------------------------------------------------------------------------------------------------------------------------------------------------------------------------------------------------------------------------------------------------------------------------------------------------------------------------------------------------------------------------------------|-------------|-----|-------------|-----|-----|-----|-----|---|--|----------|---|--|-------------------------|---|--|------------------|------|--|-----------|---|--|---------------|-----------|--|-------|-----|-----|-----|-----|-----|-----|-----|-----|-----|------------|----|----|----|----|----|----|----|----|----|------------|----|----|----|----|----|-----|-----|-----|-----|----------------------------------------------------------------------------------------------------------------------------------------------------------------------------------------------------------------------------------------------------------------------------------------------------------------------------------------------------------------------------------------------------------------------------------------------------------------------------------------------------------------------------------------------------------------------------------------------------------------------------------------------|--------------------|--|--|----------|-------------------|--|---------------------|--|---------------|--|-------------------------|--|------------------|--|----------------------------|--|------------------------------|--|----------------------|--|--------------|--|
| NoSAS Score                                                                                                                                                                                                                                                                                                                                                                                                                                                                                                                                                                                                                                                                                                                        |           | Apnea Score                                                                                                                                                                                                                                                                                                                                                                                                                                                                                                                                                                                                                                                                                                                                                                                                                                                                                                                                                                                                                                  |             |     |             |     |     |     |     |   |  |          |   |  |                         |   |  |                  |      |  |           |   |  |               |           |  |       |     |     |     |     |     |     |     |     |     |            |    |    |    |    |    |    |    |    |    |            |    |    |    |    |    |     |     |     |     |                                                                                                                                                                                                                                                                                                                                                                                                                                                                                                                                                                                                                                              |                    |  |  |          |                   |  |                     |  |               |  |                         |  |                  |  |                            |  |                              |  |                      |  |              |  |
|                                                                                                                                                                                                                                                                                                                                                                                                                                                                                                                                                                                                                                                                                                                                    | Pt        |                                                                                                                                                                                                                                                                                                                                                                                                                                                                                                                                                                                                                                                                                                                                                                                                                                                                                                                                                                                                                                              |             |     |             |     |     |     |     |   |  |          |   |  |                         |   |  |                  |      |  |           |   |  |               |           |  |       |     |     |     |     |     |     |     |     |     |            |    |    |    |    |    |    |    |    |    |            |    |    |    |    |    |     |     |     |     |                                                                                                                                                                                                                                                                                                                                                                                                                                                                                                                                                                                                                                              |                    |  |  |          |                   |  |                     |  |               |  |                         |  |                  |  |                            |  |                              |  |                      |  |              |  |
| ♂                                                                                                                                                                                                                                                                                                                                                                                                                                                                                                                                                                                                                                                                                                                                  | 2         |                                                                                                                                                                                                                                                                                                                                                                                                                                                                                                                                                                                                                                                                                                                                                                                                                                                                                                                                                                                                                                              |             |     |             |     |     |     |     |   |  |          |   |  |                         |   |  |                  |      |  |           |   |  |               |           |  |       |     |     |     |     |     |     |     |     |     |            |    |    |    |    |    |    |    |    |    |            |    |    |    |    |    |     |     |     |     |                                                                                                                                                                                                                                                                                                                                                                                                                                                                                                                                                                                                                                              |                    |  |  |          |                   |  |                     |  |               |  |                         |  |                  |  |                            |  |                              |  |                      |  |              |  |
| Età ≥ 55                                                                                                                                                                                                                                                                                                                                                                                                                                                                                                                                                                                                                                                                                                                           | 4         |                                                                                                                                                                                                                                                                                                                                                                                                                                                                                                                                                                                                                                                                                                                                                                                                                                                                                                                                                                                                                                              |             |     |             |     |     |     |     |   |  |          |   |  |                         |   |  |                  |      |  |           |   |  |               |           |  |       |     |     |     |     |     |     |     |     |     |            |    |    |    |    |    |    |    |    |    |            |    |    |    |    |    |     |     |     |     |                                                                                                                                                                                                                                                                                                                                                                                                                                                                                                                                                                                                                                              |                    |  |  |          |                   |  |                     |  |               |  |                         |  |                  |  |                            |  |                              |  |                      |  |              |  |
| Misura del collo: ≥40cm                                                                                                                                                                                                                                                                                                                                                                                                                                                                                                                                                                                                                                                                                                            | 4         |                                                                                                                                                                                                                                                                                                                                                                                                                                                                                                                                                                                                                                                                                                                                                                                                                                                                                                                                                                                                                                              |             |     |             |     |     |     |     |   |  |          |   |  |                         |   |  |                  |      |  |           |   |  |               |           |  |       |     |     |     |     |     |     |     |     |     |            |    |    |    |    |    |    |    |    |    |            |    |    |    |    |    |     |     |     |     |                                                                                                                                                                                                                                                                                                                                                                                                                                                                                                                                                                                                                                              |                    |  |  |          |                   |  |                     |  |               |  |                         |  |                  |  |                            |  |                              |  |                      |  |              |  |
| BMI 25-30 // >30                                                                                                                                                                                                                                                                                                                                                                                                                                                                                                                                                                                                                                                                                                                   | 3//5      |                                                                                                                                                                                                                                                                                                                                                                                                                                                                                                                                                                                                                                                                                                                                                                                                                                                                                                                                                                                                                                              |             |     |             |     |     |     |     |   |  |          |   |  |                         |   |  |                  |      |  |           |   |  |               |           |  |       |     |     |     |     |     |     |     |     |     |            |    |    |    |    |    |    |    |    |    |            |    |    |    |    |    |     |     |     |     |                                                                                                                                                                                                                                                                                                                                                                                                                                                                                                                                                                                                                                              |                    |  |  |          |                   |  |                     |  |               |  |                         |  |                  |  |                            |  |                              |  |                      |  |              |  |
| Russare=2                                                                                                                                                                                                                                                                                                                                                                                                                                                                                                                                                                                                                                                                                                                          | 2         |                                                                                                                                                                                                                                                                                                                                                                                                                                                                                                                                                                                                                                                                                                                                                                                                                                                                                                                                                                                                                                              |             |     |             |     |     |     |     |   |  |          |   |  |                         |   |  |                  |      |  |           |   |  |               |           |  |       |     |     |     |     |     |     |     |     |     |            |    |    |    |    |    |    |    |    |    |            |    |    |    |    |    |     |     |     |     |                                                                                                                                                                                                                                                                                                                                                                                                                                                                                                                                                                                                                                              |                    |  |  |          |                   |  |                     |  |               |  |                         |  |                  |  |                            |  |                              |  |                      |  |              |  |
| <b>Totale</b>                                                                                                                                                                                                                                                                                                                                                                                                                                                                                                                                                                                                                                                                                                                      | <b>≥8</b> |                                                                                                                                                                                                                                                                                                                                                                                                                                                                                                                                                                                                                                                                                                                                                                                                                                                                                                                                                                                                                                              |             |     |             |     |     |     |     |   |  |          |   |  |                         |   |  |                  |      |  |           |   |  |               |           |  |       |     |     |     |     |     |     |     |     |     |            |    |    |    |    |    |    |    |    |    |            |    |    |    |    |    |     |     |     |     |                                                                                                                                                                                                                                                                                                                                                                                                                                                                                                                                                                                                                                              |                    |  |  |          |                   |  |                     |  |               |  |                         |  |                  |  |                            |  |                              |  |                      |  |              |  |
| cm/kg                                                                                                                                                                                                                                                                                                                                                                                                                                                                                                                                                                                                                                                                                                                              | 155       | 160                                                                                                                                                                                                                                                                                                                                                                                                                                                                                                                                                                                                                                                                                                                                                                                                                                                                                                                                                                                                                                          | 165         | 170 | 175         | 180 | 185 | 190 | 195 |   |  |          |   |  |                         |   |  |                  |      |  |           |   |  |               |           |  |       |     |     |     |     |     |     |     |     |     |            |    |    |    |    |    |    |    |    |    |            |    |    |    |    |    |     |     |     |     |                                                                                                                                                                                                                                                                                                                                                                                                                                                                                                                                                                                                                                              |                    |  |  |          |                   |  |                     |  |               |  |                         |  |                  |  |                            |  |                              |  |                      |  |              |  |
| >25 BMI =>                                                                                                                                                                                                                                                                                                                                                                                                                                                                                                                                                                                                                                                                                                                         | 60        | 65                                                                                                                                                                                                                                                                                                                                                                                                                                                                                                                                                                                                                                                                                                                                                                                                                                                                                                                                                                                                                                           | 70          | 75  | 80          | 85  | 90  | 95  | 95  |   |  |          |   |  |                         |   |  |                  |      |  |           |   |  |               |           |  |       |     |     |     |     |     |     |     |     |     |            |    |    |    |    |    |    |    |    |    |            |    |    |    |    |    |     |     |     |     |                                                                                                                                                                                                                                                                                                                                                                                                                                                                                                                                                                                                                                              |                    |  |  |          |                   |  |                     |  |               |  |                         |  |                  |  |                            |  |                              |  |                      |  |              |  |
| >30 BMI =>                                                                                                                                                                                                                                                                                                                                                                                                                                                                                                                                                                                                                                                                                                                         | 75        | 80                                                                                                                                                                                                                                                                                                                                                                                                                                                                                                                                                                                                                                                                                                                                                                                                                                                                                                                                                                                                                                           | 85          | 90  | 95          | 100 | 105 | 110 | 115 |   |  |          |   |  |                         |   |  |                  |      |  |           |   |  |               |           |  |       |     |     |     |     |     |     |     |     |     |            |    |    |    |    |    |    |    |    |    |            |    |    |    |    |    |     |     |     |     |                                                                                                                                                                                                                                                                                                                                                                                                                                                                                                                                                                                                                                              |                    |  |  |          |                   |  |                     |  |               |  |                         |  |                  |  |                            |  |                              |  |                      |  |              |  |
| SLEEP HEALTH SCORE                                                                                                                                                                                                                                                                                                                                                                                                                                                                                                                                                                                                                                                                                                                 |           |                                                                                                                                                                                                                                                                                                                                                                                                                                                                                                                                                                                                                                                                                                                                                                                                                                                                                                                                                                                                                                              |             |     |             |     |     |     |     |   |  |          |   |  |                         |   |  |                  |      |  |           |   |  |               |           |  |       |     |     |     |     |     |     |     |     |     |            |    |    |    |    |    |    |    |    |    |            |    |    |    |    |    |     |     |     |     |                                                                                                                                                                                                                                                                                                                                                                                                                                                                                                                                                                                                                                              |                    |  |  |          |                   |  |                     |  |               |  |                         |  |                  |  |                            |  |                              |  |                      |  |              |  |
|                                                                                                                                                                                                                                                                                                                                                                                                                                                                                                                                                                                                                                                                                                                                    | 1pt/item  |                                                                                                                                                                                                                                                                                                                                                                                                                                                                                                                                                                                                                                                                                                                                                                                                                                                                                                                                                                                                                                              |             |     |             |     |     |     |     |   |  |          |   |  |                         |   |  |                  |      |  |           |   |  |               |           |  |       |     |     |     |     |     |     |     |     |     |            |    |    |    |    |    |    |    |    |    |            |    |    |    |    |    |     |     |     |     |                                                                                                                                                                                                                                                                                                                                                                                                                                                                                                                                                                                                                                              |                    |  |  |          |                   |  |                     |  |               |  |                         |  |                  |  |                            |  |                              |  |                      |  |              |  |
| Durata: H1 = 6-8h                                                                                                                                                                                                                                                                                                                                                                                                                                                                                                                                                                                                                                                                                                                  |           |                                                                                                                                                                                                                                                                                                                                                                                                                                                                                                                                                                                                                                                                                                                                                                                                                                                                                                                                                                                                                                              |             |     |             |     |     |     |     |   |  |          |   |  |                         |   |  |                  |      |  |           |   |  |               |           |  |       |     |     |     |     |     |     |     |     |     |            |    |    |    |    |    |    |    |    |    |            |    |    |    |    |    |     |     |     |     |                                                                                                                                                                                                                                                                                                                                                                                                                                                                                                                                                                                                                                              |                    |  |  |          |                   |  |                     |  |               |  |                         |  |                  |  |                            |  |                              |  |                      |  |              |  |
| Tipo di mattina: H3                                                                                                                                                                                                                                                                                                                                                                                                                                                                                                                                                                                                                                                                                                                |           |                                                                                                                                                                                                                                                                                                                                                                                                                                                                                                                                                                                                                                                                                                                                                                                                                                                                                                                                                                                                                                              |             |     |             |     |     |     |     |   |  |          |   |  |                         |   |  |                  |      |  |           |   |  |               |           |  |       |     |     |     |     |     |     |     |     |     |            |    |    |    |    |    |    |    |    |    |            |    |    |    |    |    |     |     |     |     |                                                                                                                                                                                                                                                                                                                                                                                                                                                                                                                                                                                                                                              |                    |  |  |          |                   |  |                     |  |               |  |                         |  |                  |  |                            |  |                              |  |                      |  |              |  |
| Russare: ① ≤1                                                                                                                                                                                                                                                                                                                                                                                                                                                                                                                                                                                                                                                                                                                      |           |                                                                                                                                                                                                                                                                                                                                                                                                                                                                                                                                                                                                                                                                                                                                                                                                                                                                                                                                                                                                                                              |             |     |             |     |     |     |     |   |  |          |   |  |                         |   |  |                  |      |  |           |   |  |               |           |  |       |     |     |     |     |     |     |     |     |     |            |    |    |    |    |    |    |    |    |    |            |    |    |    |    |    |     |     |     |     |                                                                                                                                                                                                                                                                                                                                                                                                                                                                                                                                                                                                                                              |                    |  |  |          |                   |  |                     |  |               |  |                         |  |                  |  |                            |  |                              |  |                      |  |              |  |
| Sonnolenza diurna: ② ≤1                                                                                                                                                                                                                                                                                                                                                                                                                                                                                                                                                                                                                                                                                                            |           |                                                                                                                                                                                                                                                                                                                                                                                                                                                                                                                                                                                                                                                                                                                                                                                                                                                                                                                                                                                                                                              |             |     |             |     |     |     |     |   |  |          |   |  |                         |   |  |                  |      |  |           |   |  |               |           |  |       |     |     |     |     |     |     |     |     |     |            |    |    |    |    |    |    |    |    |    |            |    |    |    |    |    |     |     |     |     |                                                                                                                                                                                                                                                                                                                                                                                                                                                                                                                                                                                                                                              |                    |  |  |          |                   |  |                     |  |               |  |                         |  |                  |  |                            |  |                              |  |                      |  |              |  |
| Insonnia: ③&⑤ ≤1                                                                                                                                                                                                                                                                                                                                                                                                                                                                                                                                                                                                                                                                                                                   |           |                                                                                                                                                                                                                                                                                                                                                                                                                                                                                                                                                                                                                                                                                                                                                                                                                                                                                                                                                                                                                                              |             |     |             |     |     |     |     |   |  |          |   |  |                         |   |  |                  |      |  |           |   |  |               |           |  |       |     |     |     |     |     |     |     |     |     |            |    |    |    |    |    |    |    |    |    |            |    |    |    |    |    |     |     |     |     |                                                                                                                                                                                                                                                                                                                                                                                                                                                                                                                                                                                                                                              |                    |  |  |          |                   |  |                     |  |               |  |                         |  |                  |  |                            |  |                              |  |                      |  |              |  |
| Regolarità: ⑦ ≤1 & H4 = no                                                                                                                                                                                                                                                                                                                                                                                                                                                                                                                                                                                                                                                                                                         |           |                                                                                                                                                                                                                                                                                                                                                                                                                                                                                                                                                                                                                                                                                                                                                                                                                                                                                                                                                                                                                                              |             |     |             |     |     |     |     |   |  |          |   |  |                         |   |  |                  |      |  |           |   |  |               |           |  |       |     |     |     |     |     |     |     |     |     |            |    |    |    |    |    |    |    |    |    |            |    |    |    |    |    |     |     |     |     |                                                                                                                                                                                                                                                                                                                                                                                                                                                                                                                                                                                                                                              |                    |  |  |          |                   |  |                     |  |               |  |                         |  |                  |  |                            |  |                              |  |                      |  |              |  |
| Disturbo del sonno: ⑧&⑨&⑩ ≤1                                                                                                                                                                                                                                                                                                                                                                                                                                                                                                                                                                                                                                                                                                       |           |                                                                                                                                                                                                                                                                                                                                                                                                                                                                                                                                                                                                                                                                                                                                                                                                                                                                                                                                                                                                                                              |             |     |             |     |     |     |     |   |  |          |   |  |                         |   |  |                  |      |  |           |   |  |               |           |  |       |     |     |     |     |     |     |     |     |     |            |    |    |    |    |    |    |    |    |    |            |    |    |    |    |    |     |     |     |     |                                                                                                                                                                                                                                                                                                                                                                                                                                                                                                                                                                                                                                              |                    |  |  |          |                   |  |                     |  |               |  |                         |  |                  |  |                            |  |                              |  |                      |  |              |  |
| Soddisfazione: 11 ≤1                                                                                                                                                                                                                                                                                                                                                                                                                                                                                                                                                                                                                                                                                                               |           |                                                                                                                                                                                                                                                                                                                                                                                                                                                                                                                                                                                                                                                                                                                                                                                                                                                                                                                                                                                                                                              |             |     |             |     |     |     |     |   |  |          |   |  |                         |   |  |                  |      |  |           |   |  |               |           |  |       |     |     |     |     |     |     |     |     |     |            |    |    |    |    |    |    |    |    |    |            |    |    |    |    |    |     |     |     |     |                                                                                                                                                                                                                                                                                                                                                                                                                                                                                                                                                                                                                                              |                    |  |  |          |                   |  |                     |  |               |  |                         |  |                  |  |                            |  |                              |  |                      |  |              |  |
| <b>Total</b>                                                                                                                                                                                                                                                                                                                                                                                                                                                                                                                                                                                                                                                                                                                       |           |                                                                                                                                                                                                                                                                                                                                                                                                                                                                                                                                                                                                                                                                                                                                                                                                                                                                                                                                                                                                                                              |             |     |             |     |     |     |     |   |  |          |   |  |                         |   |  |                  |      |  |           |   |  |               |           |  |       |     |     |     |     |     |     |     |     |     |            |    |    |    |    |    |    |    |    |    |            |    |    |    |    |    |     |     |     |     |                                                                                                                                                                                                                                                                                                                                                                                                                                                                                                                                                                                                                                              |                    |  |  |          |                   |  |                     |  |               |  |                         |  |                  |  |                            |  |                              |  |                      |  |              |  |
